# Supplementary material
Source: publisher figshare collection journal article supplement (https://frontiersin.figshare.com/ndownloader/files/20136182)
Supplement: Supplementary file 1 [file 20136182]

## Sheet: Sheet1
	station (raw data)	sample	size fraction	Batysiphon sp.	Bigenerina nodosaria	Biloculina sp.	Bolivina spissa	Buccella frigida	Cassidulina neoteretis	Cassidulina reniforme	Chilostomella fusiformis	Cibicides lobatulus	Cibicides pachydermus	Cibicides wuellerstorfi	Cibicides refulgens	Recurvoides turbinatum	Dentalina sp.	Discorbina sp.	Astrononion gallawayi	Elphidium excavatum	Epistominella arctica	Favulina hexagona	Fissurina sp.	Fusenkonia fusiformis	Glanlulina sp.	Globobulimina turgida	Gyroidina sp.	Hyalinea balthica	Islandiella norcrossi	Labrospira sp.	Lagena sp.	Lenticulina convergens	Melonis barleeanus	Nodosaria sp.	Nonionella labradorica	Nonionella turgida	Pullenia bulloides	Pullenia quinqueloba	Quinqueloculina sp.	Reophax bilocularis	Reophax guttifera	Reophax scorpiurus	Hyperamina sp.	Sigmoilopsis sp.	Stainforthia loeblichi	Textularia agglutinans	Trifarina earlandi	Triloculins triangula	Triloculina sp.
	P1606-007	0-1 cm	> 63
			> 125											2
			> 63					1	1	6		10							1				1										16
			> 125						8	3		17		5	2				13	2			1						2				35		1		2						2
			tot.
	P1606-007	1-2 cm	> 63					3				2
			> 125																																		1
			> 63				3	56	96	64		22											2								1		26		1		1								5		1
			> 125					5	76	12		73				3		1	5				3						1				20				2		19						1
			tot.
	P1606-007	2-3 cm	> 63																														1
			> 125
			> 63					20	51	40		20																					50				1						1		2		1
			> 125					5	30	3		40							2														28				1		9
			tot.
	P1606-007	3-4 cm	> 63
			> 125
			> 63				6	5	51	75		25											1								2		24		1												1
			> 125					16	78	29		50	27	17					10				1					3			2		67		10		2							1			2
	P1606-008	0-1 cm	> 63					24	21	19			7	2																			1							2	2	4
			> 125					1	2	1		2		5																											2	4
			> 63			2	4	54	91	90			17	13				4			2										4		59		3		2			2	2	5			3	5
			> 125					1	5	1		2		1																			3								2	4
	P1606-008	1-2 cm	> 63					7	16	11				4																			4
			> 125											3															2		1
			> 63			1		11	12	16				9																	1		6														1
			> 125						6				1	3															2				1
	P1606-008	2-3 cm	> 63					10	7	9																							3
			> 125						1	2			3	7															1				1
			> 63					26	23	30		10																					14				1								1
			> 125			1		2	13	1			2	9															2				6
	P1606-008	3-4 cm	> 63					1								2																	1
			> 125
			> 63		6			6	3	3						13							2										6
			> 125					1	1	1						1																	1
	P1606-008	4-5 cm	> 63
			> 125
			> 63		4					2						2																	7
			> 125					3	2	2				2																			10				1			2
	P1606-009	0-1 cm	> 63
			> 125										1																1
			> 63					11	12	22		16				4							1										18												1
			> 125		1				20	2		8	9						6										4		1		6		1		1		2					1
	P1606-009	1-2 cm	> 63
			> 125
			> 63					9	21	16		15																					17												5	2
			> 125					10	4	2	1	11		5					3												1		14		2
	P1606-009	2-3 cm	> 63
			> 125
			> 63				1	20	36	56		30											2	2									30		1										8	2		2
			> 125					17	12	5		19		2					2												1	1	14				4		1
	P1606-009	3-4 cm	> 63
			> 125						1				1	1
			> 63						20	4		19																					17				2
			> 125						14	2		35	7	4					2										2				8				1
	P1606-015	0-1 cm	> 63					2
			> 125					1		1				2
			> 63					4	3	2		11							1														9
			> 125			2		5	5			13	2																				12
	P1606-015	1-2 cm	> 63									1																					4
			> 125									1																					1
			> 63					9	15	12		21							2										2				22
			> 125					22	16	3		49							3	1		1	2						3		3		26		4
	P1606-016	0-1 cm	> 63
			> 125						3	1				2
			> 63					6	12	24		9											1								1		22
			> 125					13	24	8			6	30															2		3		85		5		1
	P1606-016	1-2 cm	> 63					3	4	5																							3
			> 125
			> 63				1	19	48	46		28				2								2									54				3								2
			> 125					20	22	9		41							4	14			2		1						1		172	2	19		9		1
	P1606-016	2-3 cm	> 63							3		1																									1
			> 125											1
			> 63				10	18	43	79		19				1								6									51		4		2
			> 125					8	59	14		20		15					20	14				2					1		5		156		19	3	10
	P1606-016	3-4 cm	> 63
			> 125									2	1						4														12		2		2
			> 63				5	13	67	60		18												4			2				1		49		2	1
			> 125					5	53	10		51	9	20			3		57							2							220		24	1	17								2
	P1606-016	4-5 cm	> 63
			> 125									2
			> 63				3	15	65	105		30												5									52		2				3
			> 125					15	55	17		27		20					15	14		1	1		2				3		1		187	1	14	5	15	1											2
	P1606-017	0-1 cm	> 63
			> 125
			> 63				1	2	7	26		18				4							2										18												1
			> 125						4			4							2										4		1		31				3					1		1
	P1606-017	1-2 cm	> 63
			> 125									5		1
			> 63		1			10	26	27		27				2								4									55				1		2	2
			> 125					2	5	1		21		3					1			1	1										11						1
	P1606-017	2-3 cm	> 63
			> 125
			> 63				2		16	29	1	25				3								5			3						18				1
			> 125						7			2		4					1														6					1
	P1606-017	3-4 cm	> 63
			> 125
			> 63					1	2	2																							10
			> 125						1																				1				7		1		1
	P1606-018	0-1 cm	> 63										3																				2
			> 125											2
			> 63						1	1			3																				3									2
			> 125											2									1										4				2
	P1606-018	1-2 cm	> 63					3		2																							2
			> 125																														1
			> 63					18	15	28																							49														1
			> 125					3	3			6							1			1	1								1		14
	P1606-018	2-3 cm	> 63									2
			> 125											2																			1
			> 63					19	43	28		18																					35		1												1
			> 125					3	8	4		9		4					2			1											25
	P1606-018	3-4 cm	> 63					3	1	1						2																	8
			> 125									5	3																				4				2
			> 63		6			31	26	33		25				13							3										64	1			1
			> 125						3	2		11	5						1												1		26
	P1606-018	4-5 cm	> 63					5		4																							7
			> 125						2			4
			> 63					20	20	40		18																					37
			> 125					3	3	1		3		1																			2
	P1606-019	0-1 cm	> 63					19	9	6			11	3															1				4				1					10		1
			> 125										2	4																			1
			> 63		1			30	34	87	2		19	36									5						6	4	3		49				1					10
			> 125					2	4	3			4	3																			15				1
	P1606-019	1-2 cm	> 63					3		1		2																					3
			> 125
			> 63					10	5	10		27											1										30												2
			> 125					2				5																					13	1
	P1606-019	2-3 cm	> 63					6				6																					3				1
			> 125
			> 63					24	20			40																	2				34				2								1		1
			> 125					2	6	2		24					1						1										32		1		4
	P1606-019	3-4 cm	> 63
			> 125
			> 63					3	1	3		3																					11
			> 125											1			1												1				2
	P1606-019	4-5 cm	> 63									1																					1
			> 125
			> 63							1		3																					2
			> 125						1			1
	P1606-020	0-1 cm	> 63					8	18	35			7			4													2				6			1				4	20				2
			> 125			1		2	35	1			3	10		10													1				30				7					11	1
			> 63				3	68	80	215			54	90									3						40						10	6	19		3	13	33				6	4
			> 125					2	42	11			6	9		12													5				32	1			5					21
	P1606-021	0-1 cm	> 63
			> 125
			> 63				1	24	69	151		68	1			3			2			1					10				2	1	113		2		2		1		3				17		1
			> 125						48	14		39	14						17										16		2	2	210	1	4		25
	P1606-021	1-2 cm	> 63
			> 125
			> 63					3	25	27		12							1				1										37												2	2
			> 125					7	27	9		27	2			1			11	3			1								1		180		5		16								1
	P1606-021	2-3 cm	> 63
			> 125
			> 63					17	46	113		27				2											14						68		1										11	1	1
			> 125					27	58	16	1	45				1			13										1				150		2	1	12					1
	P1606-021	3-4 cm	> 63
			> 125
			> 63					10	29	38		10				3							1				6						37		2		1				1	2			1
			> 125	1				3	21	9		16	4	4		2			6				3						2		2		53			2	4		1			3
	P1606-025	0-1 cm	> 63											1																							1
			> 125
			> 63																														2
			> 125						2					1									1																			1
	P1606-025	1-2 cm	> 63							4		3																					5
			> 125									4		1
			> 63					2	5	9		8																					8															1
			> 125					5	5			1		1					1											1			2				1
	P1606-025	2-3 cm	> 63					3	15	7		5																					14
			> 125						2			1		1
			> 63					10	108	39		26																			1		31				1								4
			> 125						49	3				3																			2
	P1606-025	3-4 cm	> 63						2	3		1																					5
			> 125									3	2																2
			> 63					5	58	39		16																					18												3
			> 125							2		8	13	1					1										2				1
	P1606-025	4-5 cm	> 63					1	5	7		2																					7				1
			> 125							1		6		2															1				1				1
			> 63					6	130	77		18											2				3						22			1	2								2
			> 125						34	4				4						1									15								1
				Caption: Total counts of benthic foraminifera, living (Rose Bengale stained in pink) and dead (in black), from the size fractions >63 µm and >125 µm.
[truncated: 4 more columns]
